# Supplementary material for: The natural product erianin induces melanoma apoptosis through targeting the GSK3α-NF-κB pathway
Source: Research Square preprint supplement (doi:10.21203/rs.3.rs-2235822/v1), 2022-11-15
Supplement: Supplementary file 1 [file 2f0f31b1a3274bca3558d875.xlsx]

## Sheet: Sheet1
Fig5C MEL-290
Genes	0 nM	50 nM	100 nM	200 nM
GSK3α	23.34	23.52	23.98	24.23
	23.17	23.58	24.04	24.3
	23.24	23.67	24.06	24.41
GAPDH	17.05	17.34	16.89	17.6
	17.1	17.53	16.86	17.5
	17.09	17.49	16.91	17.52
Fig5C A375
Genes	0 nM	50 nM	100 nM	200 nM
GSK3α	22.75	23.15	22.81	23.59
	22.81	23.21	22.91	23.61
	22.81	23.28	22.87	23.6
GAPDH	15.16	15.17	15.08	15.81
	15.23	15.29	15.12	15.8
	15.13	15.11	15.17	16.42
Fig6A
Genes	PIG1	MEL-290	92.1	OMM2.3	A375	SK28
GSK3α	20.99	22.64	23.78	22.31	21.92	25.89
	21	22.66	23.93	23.5	21.88	24.85
	21.12	22.71 16.74	23.97 18.07	23.25	21.81	25.17
GAPDH	14.95	16.79	18.2	16.85	14.61	17
	14.96	16.85	18.23	17.03	14.69	17.09
	15.01			17.11	14.74	17.25
